# Supplementary material for: Survival After Heart Transplant Listing for Infants on Mechanical Circulatory Support
Source: PubMed Central journal article supplement — J Am Heart Assoc. 2020 Oct 20;9(21):e011890. doi: 10.1161/JAHA.118.011890 (PMC7763397; doi:10.1161/jaha.118.011890), 2020-10-20
Supplement: JAH3-9-e011890-s001.pdf [file JAH3-9-e011890-s001.pdf]

# **SUPPLEMENTAL MATERIAL**

**Table S1. PHTS Sites.**

---

Arkansas Children's Hospital

Boston Children's Hospital

University of California, San Francisco-Benioff Children's Hospital

Cleveland Clinic Children's

Cincinnati Children's Hospital Medical Center

Nationwide Children's Hospital

Cardinal Glennon Children's Medical Center

Children's Hospital of Los Angeles

Children's Hospital of Pittsburgh of UPMC

Children's Hospital of Wisconsin

Ann & Robert H. Lurie Children's Hospital of Chicago

University of Texas, Children's Medical Center

Children's Mercy Hospital and Clinics

Children's National Medical Center

The Children's Hospital of Philadelphia

Columbia University-Morgan Stanley Children's Hospital of New York Presbyterian

Duke Children's Hospital

Children's Healthcare of Atlanta

Freeman Hospital, Newcastle upon Tyne

University of Florida, Shands Hospital

Great Ormond Street Hospital for Children

Hospital for Sick Children

Riley Hospital for Children

Joe DiMaggio Children's Hospital

Johns Hopkins Hospital

University of Miami, Jackson Memorial Hospital

Levine Children's Hospital- Atrium Health

Loma Linda University Children's Hospital

Norton Children's Hospital

University of Michigan, CS Mott Children's Hospital  
University of Minnesota Masonic Children's Hospital  
Children's Hospital at Montefiore  
Medical University of South Carolina  
Mount Sinai Medical Center  
Nemours Cardiac Center  
Children's Hospital and Medical Center  
Phoenix Children's Hospital  
Primary Children's Hospital  
UC San Diego, Rady Children's Hospital  
Seattle Children's Hospital  
St. Louis Children's Hospital  
Lucile Packard Children's Hospital at Stanford  
Texas Children's Hospital  
Children's of Alabama  
Mattel Children's Hospital  
Children's Hospital Colorado  
University of Iowa Children's Hospital  
UNC Children's Hospital  
University of Alberta  
Johns Hopkins All Children's Hospital  
University of Virginia Medical Center  
Monroe Carell Jr. Children's Hospital at Vanderbilt

**Table S2. Covariates for Hazard Model.**

---

- Etiology
- Race
- Sex
- Age at Listing, months (natural log, squared)
- Weight at Listing, Kg (natural log, squared)
- Ventilator status at Listing
- Status at Listing
- Inotropes at Listing
- History of Surgery
- History of Renal Insufficiency
- Years since 2010
- Creatinine (mg/dL)
- Bilirubin (mg/dL)
- Single Ventricle Congenital Heart Disease
- ECMO
- VAD

Figure S1. Waitlist survival following first device placement for children with CM, Biventricular CHD, and Single Ventricle CHD.

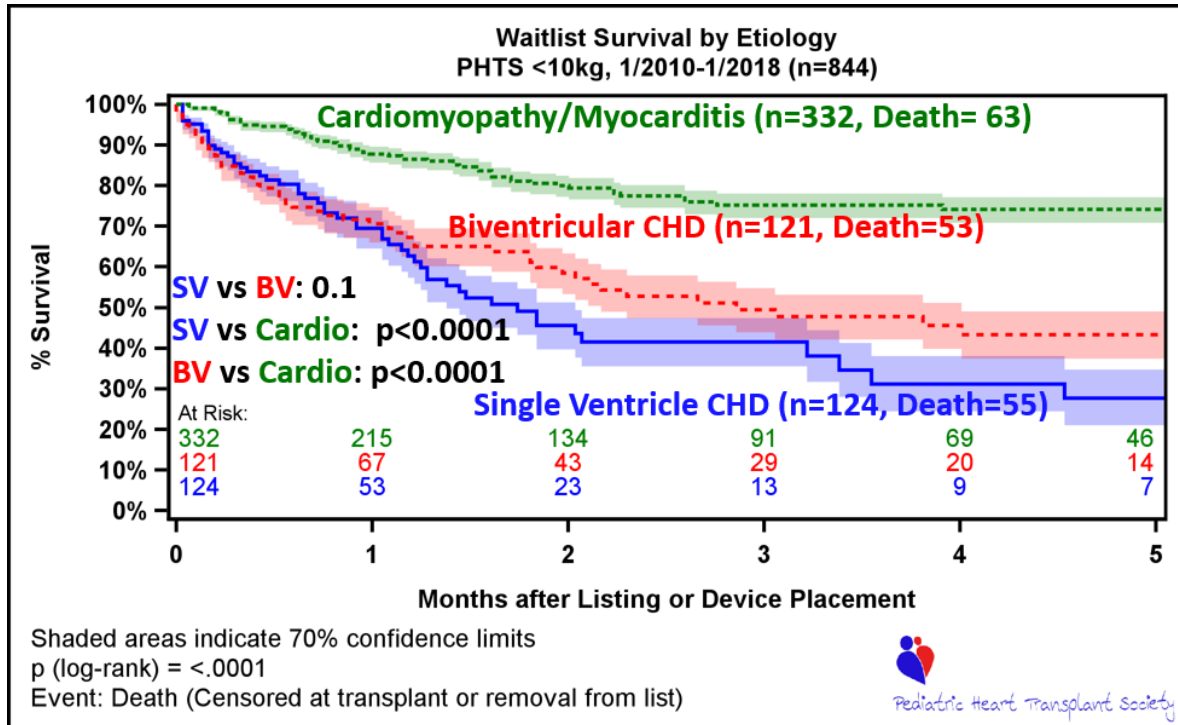

Time zero is device placement or listing (if device placed prior to listing). VAD: ventricular assist device;

ECMO: extracorporeal membrane oxygenation; CM: cardiomyopathy; CHD: congenital heart disease.
